# Supplementary material
Source: HighWire-hosted journal article supplement (https://www.jneurosci.org/highwire/filestream/598804/field_highwire_adjunct_files/2/Supplemental_Table_2.pdf)
Supplement: Supplemental_Table_2.pdf [file Supplemental_Table_2.pdf]

**SUPPLEMENTAL TABLE 2.** Genes that change  $\geq 20$ -fold during RGC development. This is a list of the 175 genes (“present” in at least 10% of the samples) that change more than 20-fold during RGC development.

| PROBE            | Gene symbol     | Gene name                                                               | Fold Change |
|------------------|-----------------|-------------------------------------------------------------------------|-------------|
| M24852_at        | Pcp4            | Purkinje cell protein 4                                                 | 1190        |
| rc_AA874803_g_at | Cxcl14          | chemokine (C-X-C motif) ligand 14                                       | 386         |
| rc_AI171462_s_at | Cd24            | CD24 antigen                                                            | 363         |
| L20468_at        | Gpc2            | glypican 2 (cerebroglycan)                                              | 222         |
| M16112_at        | Camk2b          | calcium/calmodulin-dependent protein kinase II, beta                    | 217         |
| rc_AI145494_at   | Syn2            | synapsin II                                                             | 208         |
| U23407_at        | Crabp2          | cellular retinoic acid binding protein 2                                | 172         |
| S76779_s_at      | ApoE            | apolipoprotein E                                                        | 159         |
| U72143_i_at      | Mcpt9           | mast cell protease 9                                                    | 146         |
| M22253_at        | Scn1a           | sodium channel, voltage-gated, type I, alpha                            | 143         |
| rc_AA800948_at   | Tuba4           | tubulin, alpha 4                                                        | 133         |
| rc_AI029066_at   | Cldn5           | claudin 5                                                               | 111         |
| U55816_at        | Slc12a5         | solute carrier family 12, (potassium-chloride transporter) member 5     | 101         |
| U22414_at        | Ccl3            | chemokine (C-C motif) ligand 3                                          | 98          |
| rc_AI044668_at   | Crtac1          | cartilage acidic protein 1                                              | 84          |
| rc_AA997327_at   | Cbx7            | chromobox homolog 7                                                     | 75          |
| Z75029_s_at      | Hspa1b_mapped   | heat shock 70kD protein 1B (mapped)                                     | 70          |
| rc_AA996977_s_at | Sh3glb1         | SH3-domain GRB2-like B1 (endophilin)                                    | 70          |
| rc_AI044759_at   | RGD1311455_pred | Similar to MAPK-interacting and spindle-stabilizing protein (predicted) | 69          |
| rc_AI230247_s_at | Sepp1           | selenoprotein P, plasma, 1                                              | 68          |
| rc_AI071264_at   | Bcl2a1          | B-cell leukemia/lymphoma 2 related protein A1                           | 65          |
| rc_AI044838_at   | Hpcal4          | Hippocalcin-like 4                                                      | 64          |
| rc_AI233246_at   | Igfbp7          | insulin-like growth factor binding protein 7                            | 64          |
| rc_AA956689_at   | ---             | Transcribed locus                                                       | 64          |
| rc_AI009431_at   | RGD1309651_pred | similar to 1190005I06Rik protein (predicted)                            | 63          |

| PROBE            | Gene symbol     | Gene name                                                                                                     | Fold Change |
|------------------|-----------------|---------------------------------------------------------------------------------------------------------------|-------------|
| rc_AA998683_g_at | Hspb1           | heat shock 27kDa protein 1                                                                                    | 62          |
| M26744_at        | Il6             | interleukin 6                                                                                                 | 59          |
| rc_AA943601_at   | ---             | Transcribed locus                                                                                             | 55          |
| rc_AI228050_at   | ---             | Transcribed locus                                                                                             | 55          |
| rc_AA924772_at   | Mt3             | metallothionein 3                                                                                             | 54          |
| rc_AI137958_at   | ---             | Transcribed locus                                                                                             | 53          |
| M11597_at        | Calca           | calcitonin/calcitonin-related polypeptide, alpha                                                              | 52          |
| U45965_at        | Cxcl2           | chemokine (C-X-C motif) ligand 2                                                                              | 52          |
| rc_AI136858_at   | Mybph           | Myosin binding protein H                                                                                      | 51          |
| rc_AA955132_at   | ---             | ---                                                                                                           | 51          |
| rc_AA891204_s_at | Sparc           | secreted acidic cysteine rich glycoprotein                                                                    | 49          |
| rc_AA891302_g_at | Map4k1_pred     | mitogen activated protein kinase kinase kinase 1 (predicted)                                                  | 48          |
| rc_AA943576_at   | RGD1305090_pred | Similar to CD2-associated protein (predicted)                                                                 | 48          |
| rc_AI639205_at   | Sept8_pred      | septin 8 (predicted)                                                                                          | 47          |
| rc_AI111406_at   | ---             | Transcribed locus                                                                                             | 46          |
| rc_AA924598_at   | ---             | ---                                                                                                           | 46          |
| AF030358_g_at    | Cx3cl1          | chemokine (C-X3-C motif) ligand 1                                                                             | 46          |
| rc_AA875037_at   | MGC94010        | similar to SPI6                                                                                               | 45          |
| rc_AA859581_at   | Crispld2        | cysteine-rich secretory protein LCCL domain containing 2                                                      | 45          |
| rc_AI231489_at   | Igf2bp3         | insulin-like growth factor 2, binding protein 3                                                               | 44          |
| rc_AA892854_at   | LOC498335       | similar to Small inducible cytokine B13 precursor (CXCL13) (B lymphocyte chemoattractant) (CXC chemokine BLC) | 44          |
| rc_AA997894_at   | Nova1           | Neuro-oncological ventral antigen 1                                                                           | 44          |
| rc_AI227991_at   | Vsnl1           | visinin-like 1                                                                                                | 42          |
| X57573_at        | Gad1            | glutamic acid decarboxylase 1                                                                                 | 42          |
| rc_AI228219_at   | ---             | Transcribed locus                                                                                             | 40          |
| rc_AI058810_at   | ---             | Transcribed locus                                                                                             | 40          |
| rc_AI229073_at   | ---             | Transcribed locus                                                                                             | 39          |
| rc_AI030584_at   | Ccnb1ip1        | cyclin B1 interacting protein 1                                                                               | 38          |
| rc_AA850708_at   | Myt1l           | Myelin transcription factor 1-like                                                                            | 38          |

| PROBE           | Gene symbol            | Gene name                                                                            | Fold Change |
|-----------------|------------------------|--------------------------------------------------------------------------------------|-------------|
| rc_AA818677_at  | Nefh                   | neurofilament, heavy polypeptide                                                     | 38          |
| rc_AI059345_at  | Cit                    | Citron                                                                               | 38          |
| X17053mRNA_s_at | Ccl2                   | chemokine (C-C motif) ligand 2                                                       | 37          |
| rc_AI030695_at  | Tusc5                  | tumor suppressor candidate 5                                                         | 37          |
| rc_AI070278_at  | Gpr125_pred            | G protein-coupled receptor 125 (predicted)                                           | 37          |
| rc_AI235051_at  | ---                    | Transcribed locus                                                                    | 37          |
| rc_AA964868_at  | LOC680485 // LOC684012 | hypothetical protein LOC680485 // hypothetical protein LOC684012                     | 37          |
| rc_AI177962_at  | LOC687188              | similar to AXL receptor tyrosine kinase                                              | 36          |
| Y00396mRNA_at   | Myc                    | myelocytomatosis viral oncogene homolog (avian)                                      | 36          |
| rc_AI030028_at  | ---                    | Transcribed locus                                                                    | 35          |
| rc_AI176174_at  | Tm4sf1_pred            | transmembrane 4 superfamily member 1 (predicted)                                     | 35          |
| D88250_at       | C1s                    | complement component 1, s subcomponent                                               | 34          |
| rc_AI137820_at  | Cyr61                  | Cysteine rich protein 61                                                             | 34          |
| rc_AA943764_at  | ---                    | Transcribed locus                                                                    | 34          |
| rc_AI058869_at  | LOC679386 // LOC689931 | similar to ovary-specific acidic protein // similar to ovary-specific acidic protein | 33          |
| J05510_at       | Itpr1                  | inositol 1,4,5-triphosphate receptor 1                                               | 33          |
| U69272_at       | Il15                   | interleukin 15                                                                       | 33          |
| rc_AI137423_at  | ---                    | Transcribed locus                                                                    | 33          |
| M36420_s_at     | Gria3                  | glutamate receptor, ionotropic, AMPA3 (alpha 3)                                      | 33          |
| rc_AA997533_at  | Stra6                  | stimulated by retinoic acid gene 6 homolog (mouse)                                   | 33          |
| rc_AI177026_at  | Atp1a2                 | ATPase, Na <sup>+</sup> /K <sup>+</sup> transporting, alpha 2 polypeptide            | 32          |
| rc_AA943054_at  | RGD1566090_pred        | Similar to hypothetical protein DKFZp761N1114 (predicted)                            | 31          |
| J03179_at       | Dbp                    | D site albumin promoter binding protein                                              | 31          |
| rc_AI180206_at  | Tradd                  | TNFRSF1A-associated via death domain                                                 | 31          |
| Y14933mRNA_s_at | Onecut1                | one cut domain, family member 1                                                      | 31          |
| rc_AI103410_at  | Carhsp1                | calcium regulated heat stable protein 1                                              | 31          |
| L00382cds_at    | MGC109519              | similar to tropomyosin 1, embryonic fibroblast - rat                                 | 30          |

| PROBE               | Gene symbol         | Gene name                                                                             | Fold Change |
|---------------------|---------------------|---------------------------------------------------------------------------------------|-------------|
| U09540_g_at         | Cyp1b1              | cytochrome P450, family 1, subfamily b, polypeptide 1                                 | 30          |
| J04486_at           | Igfbp2              | insulin-like growth factor binding protein 2                                          | 30          |
| rc_AA892864_at      | Hp1bp3              | Heterochromatin protein 1, binding protein 3                                          | 30          |
| rc_AI171983_at      | RGD1305117          | similar to HN1-like protein                                                           | 30          |
| rc_AA900704_at      | ---                 | Transcribed locus                                                                     | 30          |
| rc_AI102073_at      | Mal2                | mal, T-cell differentiation protein 2                                                 | 30          |
| rc_AI229172_s_at    | LOC500956           | hypothetical protein LOC500956                                                        | 30          |
| rc_AI059568_g_at    | Kbtbd10 // Ppig     | Kelch repeat and BTB (POZ) domain containing 10 // Peptidylprolyl isomerase G         | 29          |
| rc_AI102578_g_at    | ---                 | ---                                                                                   | 29          |
| U27562_at           | Sparcl1             | SPARC-like 1 (mast9, hevin)                                                           | 29          |
| X56325mRNA_s_at     | Hba-a1 // LOC360504 | hemoglobin alpha, adult chain 1 // hemoglobin alpha 2 chain                           | 29          |
| rc_AA956286_at      | ---                 | Transcribed locus                                                                     | 29          |
| AF091834_at         | Nsf                 | N-ethylmaleimide sensitive fusion protein                                             | 29          |
| rc_AI012354_at      | Hist1h2bh           | histone 1, H2bh                                                                       | 29          |
| D11445exon#1-4_s_at | Cxcl1               | chemokine (C-X-C motif) ligand 1                                                      | 29          |
| rc_AA942924_at      | Kcnip4              | Kv channel interacting protein 4                                                      | 28          |
| rc_AI231423_at      | Prkx                | protein kinase, X-linked                                                              | 27          |
| rc_AA891476_at      | ---                 | Transcribed locus, weakly similar to NP_766020.1 RIKEN cDNA C030002O17 [Mus musculus] | 27          |
| rc_AI009700_at      | RGD1305664          | Similar to KIAA0672 gene product                                                      | 27          |
| rc_AI233972_at      | Gja4                | gap junction membrane channel protein alpha 4                                         | 27          |
| rc_AI072247_at      | ---                 | Transcribed locus                                                                     | 27          |
| rc_AA819680_at      | LOC498951           | similar to 2010004A03Rik protein                                                      | 27          |
| M84488_at           | Vcam1               | vascular cell adhesion molecule 1                                                     | 27          |
| X67241cgs_at        | Rasgrf1             | RAS protein-specific guanine nucleotide-releasing factor 1                            | 27          |
| rc_AI145381_at      | Sncb                | synuclein, beta                                                                       | 27          |
| rc_AI058975_at      | ---                 | Transcribed locus                                                                     | 27          |
| U44845_at           | Vtn                 | vitronectin                                                                           | 27          |
| rc_AI072450_at      | ---                 | Transcribed locus                                                                     | 26          |

| PROBE            | Gene symbol                                                                                             | Gene name                                                                                                                                                                                                                            | Fold Change |
|------------------|---------------------------------------------------------------------------------------------------------|--------------------------------------------------------------------------------------------------------------------------------------------------------------------------------------------------------------------------------------|-------------|
| D84418_s_at      | Hmgb2 //<br>RGD1564519_pred //<br>RGD1561694_pred //<br>RGD1559962_pred //<br>LOC680704 //<br>LOC682545 | high mobility group box 2 // similar<br>to High mobility group protein 2<br>(HMG-2) (predicted)                                                                                                                                      | 26          |
| rc_AI104303_at   | RGD1305627_pred                                                                                         | hypothetical LOC314467<br>(predicted)                                                                                                                                                                                                | 26          |
| rc_AI060167_at   | ---                                                                                                     | Transcribed locus                                                                                                                                                                                                                    | 26          |
| rc_AA964584_at   | Omg                                                                                                     | oligodendrocyte-myelin<br>glycoprotein                                                                                                                                                                                               | 26          |
| rc_AA943784_s_at | Atp2b2                                                                                                  | ATPase, Ca <sup>++</sup> transporting,<br>plasma membrane 2                                                                                                                                                                          | 26          |
| X62839mRNA_s_at  | Kcnc2                                                                                                   | potassium voltage gated channel,<br>Shaw-related subfamily, member<br>2                                                                                                                                                              | 26          |
| D10693_at        | Hnmt                                                                                                    | histamine N-methyltransferase                                                                                                                                                                                                        | 26          |
| rc_AI639118_at   | RGD1559440_pred                                                                                         | similar to Ca <sup>2+</sup> -dependent<br>activator for secretion protein 2<br>(predicted)                                                                                                                                           | 26          |
| L16764_s_at      | Hspa1a //<br>Hspa1b_mapped                                                                              | heat shock 70kD protein 1A //<br>heat shock 70kD protein 1B<br>(mapped)                                                                                                                                                              | 26          |
| rc_AA924914_at   | LOC363153 //<br>RGD1307215                                                                              | similar to cyclic AMP-regulated<br>phosphoprotein, 21 isoform 2 //<br>similar to protein phosphatase 1,<br>regulatory (inhibitory) subunit 1C;<br>thymocyte ARPP; DNA segment,<br>Chr 9, Brigham & Womens<br>Genetics 1012 expressed | 25          |
| rc_AI169077_at   | Slc7a7                                                                                                  | solute carrier family 7 (cationic<br>amino acid transporter, y <sup>+</sup><br>system), member 7                                                                                                                                     | 25          |
| rc_AA964627_at   | ---                                                                                                     | Transcribed locus                                                                                                                                                                                                                    | 25          |
| rc_AA945737_at   | Cxcr4                                                                                                   | chemokine (C-X-C motif) receptor<br>4                                                                                                                                                                                                | 25          |
| rc_AI009623_at   | Rpp25                                                                                                   | ribonuclease P 25 subunit<br>(human)                                                                                                                                                                                                 | 25          |
| rc_AI170948_at   | Gpr4                                                                                                    | G protein-coupled receptor 4                                                                                                                                                                                                         | 25          |
| K02248cds_s_at   | Sst                                                                                                     | somatostatin                                                                                                                                                                                                                         | 24          |
| rc_AI072228_at   | Cd83_pred                                                                                               | CD83 antigen (predicted)                                                                                                                                                                                                             | 24          |
| rc_AI176592_at   | ---                                                                                                     | Transcribed locus                                                                                                                                                                                                                    | 24          |
| rc_AI012208_at   | ---                                                                                                     | ---                                                                                                                                                                                                                                  | 24          |
| rc_AA819292_at   | ---                                                                                                     | Transcribed locus                                                                                                                                                                                                                    | 24          |
| rc_AI172567_i_at | ---                                                                                                     | Transcribed locus                                                                                                                                                                                                                    | 24          |

| PROBE            | Gene symbol     | Gene name                                                                                                                                                       | Fold Change |
|------------------|-----------------|-----------------------------------------------------------------------------------------------------------------------------------------------------------------|-------------|
| rc_AI071307_at   | Enc1            | ectodermal-neural cortex 1                                                                                                                                      | 24          |
| rc_AI136674_at   | ---             | Transcribed locus                                                                                                                                               | 24          |
| rc_AI228253_at   | ---             | ---                                                                                                                                                             | 24          |
| rc_AA848811_at   | B2m             | Beta-2 microglobulin                                                                                                                                            | 24          |
| rc_AI101112_at   | Exoc2           | Exocyst complex component 2                                                                                                                                     | 24          |
| rc_AI113338_at   | ---             | Transcribed locus, strongly similar to XP_342569.2 PREDICTED: similar to protein tyrosine phosphatase, receptor type, T isoform 1 precursor [Rattus norvegicus] | 24          |
| rc_AI145529_at   | Acy1            | Aminoacylase 1                                                                                                                                                  | 23          |
| rc_AI101379_at   | ---             | Transcribed locus                                                                                                                                               | 23          |
| rc_AI171799_at   | Epdr2           | ependymin related protein 2 (zebrafish)                                                                                                                         | 23          |
| rc_AI010612_at   | Tnc             | Tenascin C                                                                                                                                                      | 23          |
| rc_AI012182_s_at | LOC689064       | similar to Hemoglobin beta-2 subunit (Hemoglobin beta-2 chain) (Beta-2-globin) (Hemoglobin beta chain, minor-form)                                              | 23          |
| rc_AI175539_at   | Pvalb           | parvalbumin                                                                                                                                                     | 23          |
| rc_AA964069_at   | ---             | Transcribed locus                                                                                                                                               | 23          |
| M31603_at        | Pthlh           | parathyroid hormone-like peptide                                                                                                                                | 23          |
| AF098301_at      | Fbxo2           | F-box only protein 2                                                                                                                                            | 23          |
| U09631_at        | Vipr2           | vasoactive intestinal peptide receptor 2                                                                                                                        | 23          |
| rc_AI009415_f_at | Ctsh            | cathepsin H                                                                                                                                                     | 22          |
| rc_AI029647_at   | Acbd4           | acyl-Coenzyme A binding domain containing 4                                                                                                                     | 22          |
| rc_AI233904_at   | Kbtbd3_pred     | Kelch repeat and BTB (POZ) domain containing 3 (predicted)                                                                                                      | 22          |
| rc_AI012648_at   | Cd302           | CD302 antigen                                                                                                                                                   | 22          |
| rc_AI007851_at   | RGD1306212_pred | similar to hypothetical protein DKFZp566N034 (predicted)                                                                                                        | 22          |
| rc_H31363_at     | ---             | Transcribed locus                                                                                                                                               | 22          |
| rc_AI029179_at   | Pde4a           | Phosphodiesterase 4A, cAMP specific                                                                                                                             | 22          |
| U10357_g_at      | Pdk2            | pyruvate dehydrogenase kinase, isoenzyme 2                                                                                                                      | 22          |
| rc_AI058768_at   | Plxdc2_pred     | Plexin domain containing 2 (predicted)                                                                                                                          | 22          |

| PROBE            | Gene symbol | Gene name                                                                                             | Fold Change |
|------------------|-------------|-------------------------------------------------------------------------------------------------------|-------------|
| rc_AI014130_at   | Tyki_pred   | thymidylate kinase family LPS-inducible member (predicted)                                            | 21          |
| rc_AA851471_at   | ---         | Transcribed locus                                                                                     | 21          |
| rc_AA858520_at   | Fst         | follistatin                                                                                           | 21          |
| rc_AA943229_s_at | Lgi1        | leucine-rich repeat LGI family, member 1                                                              | 21          |
| rc_AI071150_at   | Ryr2        | Ryanodine receptor 2, cardiac                                                                         | 21          |
| rc_AI010584_f_at | lfitm3      | interferon induced transmembrane protein 3                                                            | 21          |
| rc_AI009783_at   | Tfpi        | tissue factor pathway inhibitor                                                                       | 21          |
| rc_AI058396_s_at | Ua20        | Putative UA20 protein                                                                                 | 21          |
| rc_AI229196_g_at | Vamp1       | vesicle-associated membrane protein 1                                                                 | 21          |
| rc_AI170353_at   | S100a11     | S100 calcium binding protein A11 (calizzarin)                                                         | 21          |
| rc_AA957917_s_at | Slc7a1      | solute carrier family 7 (cationic amino acid transporter, y+ system), member 1                        | 21          |
| AF044201_at      | Faim2       | Fas apoptotic inhibitory molecule 2                                                                   | 21          |
| rc_AI112346_at   | RGD1305844  | hypothetical LOC294883                                                                                | 21          |
| rc_AI101500_at   | ---         | Transcribed locus                                                                                     | 21          |
| rc_AA860043_at   | Gng11       | guanine nucleotide binding protein (G protein), gamma 11                                              | 21          |
| rc_AI028815_at   | Fxyd7       | FXYP domain-containing ion transport regulator 7                                                      | 20          |
| rc_AA925373_at   | ---         | Transcribed locus, strongly similar to NP_115833.1 protocadherin 7 isoform c precursor [Homo sapiens] | 20          |
| U56261_s_at      | Snap25      | Synaptosomal-associated protein 25                                                                    | 20          |
| rc_AA943737_at   | Edg1        | endothelial differentiation sphingolipid G-protein-coupled receptor 1                                 | 20          |
| M31178_g_at      | Calb1       | calbindin 1                                                                                           | 20          |
